# Supplementary material
Source: PubMed Central journal article supplement (PMC4232222)
Supplement: NIHMS640219-supplement-Supplementary_data.pdf [file NIHMS640219-supplement-Supplementary_data.pdf]

**Upregulated genes in E11.5 *Shox2* mutant forelimbs:**

Using microarray analysis, 210 genes with log<sub>2</sub> ratios of  $\geq 0.3$  were considered as upregulated in *Shox2* Regulation (log<sub>2</sub>[fold]) presents mean values of log<sub>2</sub> ratios of 2 microarray experiments.

|    | Gene symbol   | Probe set ID | Regulation (log <sub>2</sub> [fold]) |
|----|---------------|--------------|--------------------------------------|
| 1  | Eif2s3y       | 26908_at     | 4.288574219                          |
| 2  | Uty           | 22290_at     | 4.153320313                          |
| 3  | Kdm5d         | 20592_at     | 3.4765625                            |
| 4  | Ddx3y         | 26900_at     | 2.208129883                          |
| 5  | Hoxd13        | 15433_at     | 1.769775391                          |
| 6  | 5830417110Rik | 100302730_at | 1.449707031                          |
| 7  | Hoxa13        | 15398_at     | 0.979858398                          |
| 8  | Hsd3b6        | 15497_at     | 0.932861328                          |
| 9  | Sall1         | 58198_at     | 0.904418945                          |
| 10 | Osr2          | 107587_at    | 0.896728516                          |
| 11 | Mir1195       | 100316676_at | 0.895263672                          |
| 12 | Hoxa11as      | 15397_at     | 0.883789063                          |
| 13 | Kera          | 16545_at     | 0.877685547                          |
| 14 | Trav8d-1      | 667476_at    | 0.814941406                          |
| 15 | Cbln2         | 12405_at     | 0.801635742                          |
| 16 | Rps7          | 20115_at     | 0.80090332                           |
| 17 | Gdf5          | 14563_at     | 0.760253906                          |
| 18 | LOC100861784  | 100861784_at | 0.743896484                          |
| 19 | Gm1943        | 384864_at    | 0.734863281                          |
| 20 | Gm20186       | 100504344_at | 0.728637695                          |
| 21 | Cdh10         | 320873_at    | 0.716308594                          |
| 22 | Rspo3         | 72780_at     | 0.712158203                          |
| 23 | Gm20276       | 100504540_at | 0.700439453                          |
| 24 | Npm1          | 18148_at     | 0.69909668                           |
| 25 | Igkv2-137     | 692187_at    | 0.691162109                          |
| 26 | Bhmt          | 12116_at     | 0.687866211                          |
| 27 | Klra13-ps     | 16631_at     | 0.680908203                          |
| 28 | Mir1186b      | 100499527_at | 0.662719727                          |
| 29 | Prokr2        | 246313_at    | 0.658691406                          |
| 30 | Gm2863        | 100040606_at | 0.653076172                          |
| 31 | Ifna5         | 15968_at     | 0.645263672                          |
| 32 | Gm8526        | 667230_at    | 0.633789063                          |
| 33 | Tox3          | 244579_at    | 0.631591797                          |
| 34 | Zic2          | 22772_at     | 0.630859375                          |
| 35 | Cd300lh       | 382551_at    | 0.630859375                          |
| 36 | Mir3473d      | 100628592_at | 0.614624023                          |
| 37 | Vmn1r159      | 670857_at    | 0.605712891                          |
| 38 | Mir1945       | 100316833_at | 0.604492188                          |
| 39 | Zic3          | 22773_at     | 0.598510742                          |
| 40 | Igkv4-58      | 381831_at    | 0.593139648                          |
| 41 | H2afy3        | 67552_at     | 0.582641602                          |

|    |    |               |              |             |
|----|----|---------------|--------------|-------------|
| 1  |    |               |              |             |
| 2  | 42 | Fign          | 60344_at     | 0.578613281 |
| 3  | 43 | Hoxd12        | 15432_at     | 0.574584961 |
| 4  | 44 | Dach1         | 13134_at     | 0.573242188 |
| 5  | 45 | Olfir884      | 257996_at    | 0.572753906 |
| 6  | 46 | A530032D15Rik | 381287_at    | 0.572265625 |
| 7  | 47 | Mir669m-1     | 100316701_at | 0.561889648 |
| 8  | 48 | Cyp26b1       | 232174_at    | 0.558837891 |
| 9  | 49 | Thsd7a        | 330267_at    | 0.55847168  |
| 10 | 50 | Mir5129       | 100628598_at | 0.556152344 |
| 11 | 51 | 4930572O03Rik | 381715_at    | 0.555419922 |
| 12 | 52 | Grin3a        | 242443_at    | 0.551757813 |
| 13 | 53 | 9030025P20Rik | 100041574_at | 0.54675293  |
| 14 | 54 | Mir345        | 723946_at    | 0.546020508 |
| 15 | 55 | Gm3727        | 100042217_at | 0.543823242 |
| 16 | 56 | Cyp2a22       | 233005_at    | 0.541992188 |
| 17 | 57 | Magea2        | 17138_at     | 0.540527344 |
| 18 | 58 | Rhox4g        | 664608_at    | 0.538818359 |
| 19 | 59 | Tbx4          | 21387_at     | 0.536499023 |
| 20 | 60 | Gria2         | 14800_at     | 0.532958984 |
| 21 | 61 | Gsdmcl1       | 74236_at     | 0.520996094 |
| 22 | 62 | Mir874        | 100124491_at | 0.520263672 |
| 23 | 63 | Scarna3a      | 100217414_at | 0.520141602 |
| 24 | 64 | Zfp949        | 71640_at     | 0.517211914 |
| 25 | 65 | Gm15881       | 100271928_at | 0.512207031 |
| 26 | 66 | Fgf2          | 14173_at     | 0.508789063 |
| 27 | 67 | Msx1          | 17701_at     | 0.505981445 |
| 28 | 68 | Pcdh10        | 18526_at     | 0.505126953 |
| 29 | 69 | Mir185        | 387180_at    | 0.504394531 |
| 30 | 70 | Acta1         | 11459_at     | 0.500488281 |
| 31 | 71 | Trbv2         | 100124659_at | 0.499755859 |
| 32 | 72 | A830082K12Rik | 320174_at    | 0.496582031 |
| 33 | 73 | NA            | 100861692_at | 0.493164063 |
| 34 | 74 | Pcdh9         | 211712_at    | 0.489501953 |
| 35 | 75 | Snord8        | 100217445_at | 0.487548828 |
| 36 | 76 | Chrdl1        | 83453_at     | 0.485595703 |
| 37 | 77 | Ihh           | 16147_at     | 0.48425293  |
| 38 | 78 | Igkv4-68      | 384515_at    | 0.484130859 |
| 39 | 79 | Tbx2          | 21385_at     | 0.482421875 |
| 40 | 80 | Cela2a        | 13706_at     | 0.482177734 |
| 41 | 81 | Pcdha3        | 192163_at    | 0.481201172 |
| 42 | 82 | Mrpl21        | 353242_at    | 0.481201172 |
| 43 | 83 | Pcdh7         | 54216_at     | 0.477539063 |
| 44 | 84 | Mgp           | 17313_at     | 0.475708008 |
| 45 | 85 | Il27          | 246779_at    | 0.475463867 |
| 46 | 86 | Ppargc1a      | 19017_at     | 0.47277832  |
| 47 | 87 | Gm5639        | 434795_at    | 0.472290039 |
| 48 |    |               |              |             |
| 49 |    |               |              |             |
| 50 |    |               |              |             |
| 51 |    |               |              |             |
| 52 |    |               |              |             |
| 53 |    |               |              |             |
| 54 |    |               |              |             |
| 55 |    |               |              |             |
| 56 |    |               |              |             |
| 57 |    |               |              |             |
| 58 |    |               |              |             |
| 59 |    |               |              |             |
| 60 |    |               |              |             |

|    |     |               |              |             |
|----|-----|---------------|--------------|-------------|
| 1  |     |               |              |             |
| 2  | 88  | Epha7         | 13841_at     | 0.471191406 |
| 3  | 89  | Mkx           | 210719_at    | 0.470947266 |
| 4  | 90  | Gm7144        | 634745_at    | 0.470214844 |
| 5  | 91  | Slc14a1       | 108052_at    | 0.467529297 |
| 6  | 92  | Ighv2-2       | 777686_at    | 0.464355469 |
| 7  | 93  | Gm3852        | 100042453_at | 0.461425781 |
| 8  | 94  | Fn3krp        | 238024_at    | 0.46081543  |
| 9  | 95  | Gm19693       | 100503440_at | 0.458740234 |
| 10 | 96  | Mir1198       | 100316807_at | 0.456542969 |
| 11 | 97  | 1700003F12Rik | 75480_at     | 0.455322266 |
| 12 | 98  | Mrpl33        | 66845_at     | 0.454833984 |
| 13 | 99  | Lhx2          | 16870_at     | 0.454589844 |
| 14 | 100 | Grifin        | 77998_at     | 0.453125    |
| 15 | 101 | Rps11         | 27207_at     | 0.451660156 |
| 16 | 102 | Hoxd11        | 15431_at     | 0.449707031 |
| 17 | 103 | Ebf1          | 13591_at     | 0.448730469 |
| 18 | 104 | 4930527J03Rik | 75164_at     | 0.448608398 |
| 19 | 105 | Mrgpra2a      | 668727_at    | 0.444702148 |
| 20 | 106 | Trim43c       | 666731_at    | 0.444580078 |
| 21 | 107 | Gm5936        | 546325_at    | 0.442993164 |
| 22 | 108 | Cited1        | 12705_at     | 0.442871094 |
| 23 | 109 | Hoxd10        | 15430_at     | 0.439453125 |
| 24 | 110 | Mir574        | 100124451_at | 0.438720703 |
| 25 | 111 | Prr24         | 66300_at     | 0.437744141 |
| 26 | 112 | Gm15821       | 100502931_at | 0.436279297 |
| 27 | 113 | Lrba          | 80877_at     | 0.436035156 |
| 28 | 114 | Vasn          | 246154_at    | 0.435302734 |
| 29 | 115 | 1700029P11Rik | 66346_at     | 0.434814453 |
| 30 | 116 | Rrp7a         | 74778_at     | 0.432373047 |
| 31 | 117 | Mif4gd        | 69674_at     | 0.431396484 |
| 32 | 118 | Myl1          | 17901_at     | 0.4296875   |
| 33 | 119 | Gjb6          | 14623_at     | 0.428100586 |
| 34 | 120 | Sfi1          | 78887_at     | 0.427124023 |
| 35 | 121 | Gm10020       | 100039748_at | 0.426513672 |
| 36 | 122 | Zfp503        | 218820_at    | 0.424560547 |
| 37 | 123 | Frem2         | 242022_at    | 0.423461914 |
| 38 | 124 | NA            | 100862078_at | 0.423095703 |
| 39 | 125 | Gm13123       | 100861947_at | 0.422851563 |
| 40 | 126 | Mir3058       | 100526463_at | 0.421875    |
| 41 | 127 | Gm14744       | 628923_at    | 0.421508789 |
| 42 | 128 | Ndufs6        | 407785_at    | 0.421142578 |
| 43 | 129 | 2010107G23Rik | 69894_at     | 0.420288086 |
| 44 | 130 | Ighv2-9-1     | 791089_at    | 0.419677734 |
| 45 | 131 | Gm19971       | 100503930_at | 0.417114258 |
| 46 | 132 | Trav13-2      | 638566_at    | 0.416503906 |
| 47 | 133 | Gm7589        | 665330_at    | 0.415893555 |
| 48 |     |               |              |             |
| 49 |     |               |              |             |
| 50 |     |               |              |             |
| 51 |     |               |              |             |
| 52 |     |               |              |             |
| 53 |     |               |              |             |
| 54 |     |               |              |             |
| 55 |     |               |              |             |
| 56 |     |               |              |             |
| 57 |     |               |              |             |
| 58 |     |               |              |             |
| 59 |     |               |              |             |
| 60 |     |               |              |             |

|    |     |              |              |             |
|----|-----|--------------|--------------|-------------|
| 1  |     |              |              |             |
| 2  | 134 | Gm2481       | 100039897_at | 0.415161133 |
| 3  | 135 | Smoc1        | 64075_at     | 0.414794922 |
| 4  | 136 | Cd302        | 66205_at     | 0.414672852 |
| 5  | 137 | Hand2        | 15111_at     | 0.414306641 |
| 6  | 138 | Gm15315      | 100041952_at | 0.4140625   |
| 7  | 139 | Gm5088       | 328451_at    | 0.412719727 |
| 8  | 140 | Acot8        | 170789_at    | 0.411743164 |
| 9  | 141 | Mir324       | 723896_at    | 0.411376953 |
| 10 | 142 | Kcnd2        | 16508_at     | 0.408447266 |
| 11 | 143 | Fau          | 14109_at     | 0.406738281 |
| 12 | 144 | Olfir549     | 259105_at    | 0.406738281 |
| 13 | 145 | NA           | 100862184_at | 0.405639648 |
| 14 | 146 | Kcnd3        | 56543_at     | 0.405151367 |
| 15 | 147 | LOC100503002 | 100503002_at | 0.403442383 |
| 16 | 148 | Mir1956      | 100316706_at | 0.401123047 |
| 17 | 149 | Fmo1         | 14261_at     | 0.401123047 |
| 18 | 150 | Birc3        | 11796_at     | 0.400512695 |
| 19 | 151 | Mir344       | 723931_at    | 0.400390625 |
| 20 | 152 | Pthlh        | 19227_at     | 0.400024414 |
| 21 | 153 | Slc16a3      | 80879_at     | 0.399169922 |
| 22 | 154 | Fam159a      | 545667_at    | 0.3984375   |
| 23 | 155 | Fgfbp3       | 72514_at     | 0.3984375   |
| 24 | 156 | Crybb2       | 12961_at     | 0.39831543  |
| 25 | 157 | Spock3       | 72902_at     | 0.397460938 |
| 26 | 158 | Lmo1         | 109594_at    | 0.395751953 |
| 27 | 159 | Vpreb2       | 22363_at     | 0.39453125  |
| 28 | 160 | Olfir1411    | 258483_at    | 0.391723633 |
| 29 | 161 | Slc2a8       | 56017_at     | 0.39074707  |
| 30 | 162 | Mir5109      | 100628584_at | 0.389282227 |
| 31 | 163 | Rhno1        | 72440_at     | 0.388183594 |
| 32 | 164 | Phlda3       | 27280_at     | 0.388183594 |
| 33 | 165 | Gm21190      | 100861755_at | 0.388183594 |
| 34 | 166 | Polr2c       | 20021_at     | 0.387817383 |
| 35 | 167 | Pcdhgb7      | 93704_at     | 0.384277344 |
| 36 | 168 | Mup13        | 100039089_at | 0.384155273 |
| 37 | 169 | Trbj2-5      | 100125259_at | 0.382568359 |
| 38 | 170 | Fibcd1       | 98970_at     | 0.377807617 |
| 39 | 171 | NA           | 100862318_at | 0.375       |
| 40 | 172 | Hmx2         | 15372_at     | 0.374267578 |
| 41 | 173 | Sec61g       | 20335_at     | 0.373046875 |
| 42 | 174 | Pcdh12       | 53601_at     | 0.371582031 |
| 43 | 175 | Blvra        | 109778_at    | 0.37109375  |
| 44 | 176 | Cox4i2       | 84682_at     | 0.37109375  |
| 45 | 177 | Lmx1b        | 16917_at     | 0.370117188 |
| 46 | 178 | Rilp         | 280408_at    | 0.36706543  |
| 47 | 179 | Cisd2        | 67006_at     | 0.364013672 |
| 48 |     |              |              |             |
| 49 |     |              |              |             |
| 50 |     |              |              |             |
| 51 |     |              |              |             |
| 52 |     |              |              |             |
| 53 |     |              |              |             |
| 54 |     |              |              |             |
| 55 |     |              |              |             |
| 56 |     |              |              |             |
| 57 |     |              |              |             |
| 58 |     |              |              |             |
| 59 |     |              |              |             |
| 60 |     |              |              |             |

|    |     |               |              |             |
|----|-----|---------------|--------------|-------------|
| 1  |     |               |              |             |
| 2  | 180 | Fgf17         | 14171_at     | 0.36328125  |
| 3  | 181 | Ndnl2         | 66647_at     | 0.362426758 |
| 4  | 182 | Kcne3         | 57442_at     | 0.362060547 |
| 5  | 183 | 4930404N11Rik | 432479_at    | 0.361938477 |
| 6  | 184 | Pcnp          | 76302_at     | 0.357666016 |
| 7  | 185 | Mir1946a      | 100316697_at | 0.354248047 |
| 8  | 186 | NA            | 100862070_at | 0.354125977 |
| 9  | 187 | Trbj1-6       | 100125253_at | 0.352294922 |
| 10 | 188 | Gpr31b        | 436440_at    | 0.35168457  |
| 11 | 189 | Selenbp1      | 20341_at     | 0.350708008 |
| 12 | 190 | Oxt           | 18429_at     | 0.349121094 |
| 13 | 191 | Snph          | 241727_at    | 0.347290039 |
| 14 | 192 | Gm19369       | 100502783_at | 0.346923828 |
| 15 | 193 | Tnfrsf13c     | 72049_at     | 0.344848633 |
| 16 | 194 | Cdh3          | 12560_at     | 0.34375     |
| 17 | 195 | Tnni1         | 21952_at     | 0.342041016 |
| 18 | 196 | Ngrn          | 83485_at     | 0.339599609 |
| 19 | 197 | 2210011C24Rik | 70134_at     | 0.339111328 |
| 20 | 198 | Nfix          | 18032_at     | 0.336914063 |
| 21 | 199 | Tpi1          | 21991_at     | 0.336669922 |
| 22 | 200 | 2310047M10Rik | 71923_at     | 0.334960938 |
| 23 | 201 | Pcdh11x       | 245578_at    | 0.328735352 |
| 24 | 202 | Bpifb9b       | 433492_at    | 0.326049805 |
| 25 | 203 | Hoxa11        | 15396_at     | 0.325927734 |
| 26 | 204 | Cgn           | 70737_at     | 0.322509766 |
| 27 | 205 | Lbp           | 16803_at     | 0.321655273 |
| 28 | 206 | A830052D11Rik | 402767_at    | 0.317993164 |
| 29 | 207 | Igkv15-103    | 692169_at    | 0.315917969 |
| 30 | 208 | Olf75-ps1     | 258186_at    | 0.314453125 |
| 31 | 209 | 1110038B12Rik | 68763_at     | 0.313476563 |
| 32 | 210 | Rnu11         | 353373_at    | 0.309814453 |
| 33 |     |               |              |             |
| 34 |     |               |              |             |
| 35 |     |               |              |             |
| 36 |     |               |              |             |
| 37 |     |               |              |             |
| 38 |     |               |              |             |
| 39 |     |               |              |             |
| 40 |     |               |              |             |
| 41 |     |               |              |             |
| 42 |     |               |              |             |
| 43 |     |               |              |             |
| 44 |     |               |              |             |
| 45 |     |               |              |             |
| 46 |     |               |              |             |
| 47 |     |               |              |             |
| 48 |     |               |              |             |
| 49 |     |               |              |             |
| 50 |     |               |              |             |
| 51 |     |               |              |             |
| 52 |     |               |              |             |
| 53 |     |               |              |             |
| 54 |     |               |              |             |
| 55 |     |               |              |             |
| 56 |     |               |              |             |
| 57 |     |               |              |             |
| 58 |     |               |              |             |
| 59 |     |               |              |             |
| 60 |     |               |              |             |

1  
2  
3  
4  
5  
6  
7  
8  
9  
10  
11  
12  
13  
14  
15  
16  
17  
18  
19  
20  
21  
22  
23  
24  
25  
26  
27  
28  
29  
30  
31  
32  
33  
34  
35  
36  
37  
38  
39  
40  
41  
42  
43  
44  
45  
46  
47  
48  
49  
50  
51  
52  
53  
54  
55  
56  
57  
58  
59  
60

2 -/- forelimbs compared to WT at stage E11.5.

For Peer Review
